# Supplementary material
Source: HighWire-hosted journal article supplement (https://bmjopen.bmj.com/content/8/12/e026207)
Supplement: inline-supplementary-material-1 [file inline-supplementary-material-1.pdf]

### Summary of selection criteria and scoring weights of the included schemes

| Agency | Scheme name                                              | Year listed | Assessment criteria                                                                                                                | Score  |
|--------|----------------------------------------------------------|-------------|------------------------------------------------------------------------------------------------------------------------------------|--------|
| NHMRC  | Partnership Projects                                     | 2017        | Track record of investigators relative to opportunity                                                                              | 25%    |
|        |                                                          |             | Scientific quality of the proposal and methodology                                                                                 | 25%    |
|        |                                                          |             | Relevance and likelihood to influence health and research policy and practice                                                      | 25%    |
|        |                                                          |             | Strength of partnership                                                                                                            | 25%    |
| NHMRC  | Program Grants                                           | 2017        | Team research achievements (publications, grants, awards)                                                                          | 60%    |
|        |                                                          |             | Research strategy (quality, addresses important issues, impact, innovation, achievable)                                            | 20%    |
|        |                                                          |             | Collaborative gain (team integration, training and mentoring)                                                                      | 20%    |
| NHMRC  | Project Grants                                           | 2017        | Scientific quality (research plan clarity, appropriateness and feasibility)                                                        | 50%    |
|        |                                                          |             | Significance of outcomes and/or innovation of the concept (advance knowledge, outcomes. translation, publications)                 | 25%    |
|        |                                                          |             | Team quality and capability relative to opportunity (expertise, reputation, achievements)                                          | 25%    |
| NHMRC  | Global Alliance for Chronic Diseases (GACD) <sup>a</sup> | 2014        | Relevance and quality of project (scheme objectives, appropriate and feasible methods, innovative, ethical)                        | 25%    |
|        |                                                          |             | Quality of team (high quality track-record, capacity building, public engagement)                                                  | 25%    |
|        |                                                          |             | Implementation plans/feasibility (challenges identified, inequality gaps considered)                                               | 25%    |
|        |                                                          |             | Potential impact (outcome utilization, economic impact assessed)                                                                   | 25%    |
| NHMRC  | NHMRC's Targeted Call for Research Program <sup>b</sup>  | 2013        | Scientific quality and likelihood to answer the research question(s) (relevant, feasible consumers engaged)                        | 40-60% |
|        |                                                          |             | Whether the team has all the necessary skills and expertise to achieve the expected outcomes                                       | 20-50% |
|        |                                                          |             | Significance of the project and expected outcomes                                                                                  | 0-40%  |
| NHMRC  | Dementia Research Team Grants                            | 2014        | Generate new knowledge that leads to improved health outcomes (clarity, quality of methods, feasibility, innovation)               | 25%    |
|        |                                                          |             | Record of research and translation achievement - relative to opportunity (contribution to the field of research, research outputs) | 25%    |
|        |                                                          |             | Facilitate collaboration (collaboration, integration and cohesiveness of the team)                                                 | 20%    |
|        |                                                          |             | Promote effective transfer of outcomes into health policy and/or practice (quality of the plan, involvement of end user)           | 20%    |
|        |                                                          |             | Develop the health and medical research workforce                                                                                  | 10%    |
| NHMRC  | Development Grants                                       | 2017        | Scientific merit of the proposal (quality of the scientific research)                                                              | 40%    |
|        |                                                          |             | Record of commercial achievements (relative to opportunity)                                                                        | 20%    |
|        |                                                          |             | Commercial potential (high impact, innovation, relevant to schemes objectives)                                                     | 40%    |
| NHMRC  |                                                          | 2015        | Relevance to the aims of the round and significance of outcomes (relevant to scheme objectives, potential to improve outcomes)     | 30%    |

|                                         |                                                                                |      |                                                                                                                                   |     |
|-----------------------------------------|--------------------------------------------------------------------------------|------|-----------------------------------------------------------------------------------------------------------------------------------|-----|
|                                         | National Institute for Dementia Research Grants                                |      | Project design, methods and analyses (feasible and suitable environment, consumers and clinicians engaged)                        | 30% |
|                                         |                                                                                |      | Budget justification and value for money (proposal demonstrates that it is cost effective)                                        | 15% |
|                                         |                                                                                |      | Team quality and capability relevant to the project (team capacity, ability, and expertise)                                       | 25% |
| NHMRC                                   | NHMRC/NSFC, Prediction and Treatment of Type 2 Diabetes in China and Australia | 2015 | Scientific quality of the project including feasibility (fits within aims of the scheme, feasible, appropriate methods)           | 25% |
|                                         |                                                                                |      | Significance of the expected outcomes (impact on health, advance knowledge)                                                       | 25% |
|                                         |                                                                                |      | Track record of the team (team capability, track-record)                                                                          | 25% |
|                                         |                                                                                |      | Added value of international collaboration (collaboration, transfer of knowledge)                                                 | 25% |
| NHMRC                                   | Northern Australia Tropical Disease Collaborative Research Program             | 2016 | Generate new knowledge that leads to improved health outcomes                                                                     | 20% |
|                                         |                                                                                |      | Promote effective transfer of research outcomes into health policy and/or practice                                                | 20% |
|                                         |                                                                                |      | Develop the health and medical research workforce                                                                                 | 20% |
|                                         |                                                                                |      | Facilitate collaboration                                                                                                          | 20% |
|                                         |                                                                                |      | Record of research and translation achievements - relative to opportunity                                                         | 20% |
| NHMRC                                   | Translational Research Projects                                                | 2017 | Significant relevance to the health system                                                                                        | NA  |
|                                         |                                                                                |      | Inform evidence-based improvement to health care                                                                                  | NA  |
|                                         |                                                                                |      | Outcomes for patients, and/or efficiency in healthcare and/or cost savings                                                        | NA  |
|                                         |                                                                                |      | Includes a plan for dissemination of results within the healthcare sector                                                         | NA  |
|                                         |                                                                                |      | Represents value for money                                                                                                        | NA  |
|                                         |                                                                                |      | Excellent level research team                                                                                                     | NA  |
| NHMRC                                   | Boosting Dementia Research Grants                                              | 2017 | Relevance to the aims of the round and significance of expected outcomes                                                          | 30% |
|                                         |                                                                                |      | Project design, methods and analyses (clear, coherent, involvement with consumers, innovation, feasible, translation/impact)      | 30% |
|                                         |                                                                                |      | Project justification and value for money (demonstrate value for money)                                                           | 15% |
|                                         |                                                                                |      | Team quality and capability relevant to the project (team strength, reputation, contributions)                                    | 25% |
| Department of Foreign Affairs and Trade | Tropical Disease Research Regional Collaboration Initiative                    | 2017 | Activity effectiveness and value for money (strengthen research capability and collaboration, clear objectives, budget justified) | 50% |
|                                         |                                                                                |      | Organisational effectiveness (record of strengthening research collaboration)                                                     | 50% |
| Cancer Australia                        | Priority-Driven Collaborative Cancer Scheme                                    | 2017 | Team quality and capability relevant to the application                                                                           | 40% |
|                                         |                                                                                |      | Outcomes and impact of current proposal                                                                                           | 25% |
|                                         |                                                                                |      | Translation of research                                                                                                           | 10% |
|                                         |                                                                                |      | Collaborations                                                                                                                    | 15% |
|                                         |                                                                                |      | Consumer involvement                                                                                                              | 10% |

|                                                            |                                                  |      |                                                                                                                               |       |
|------------------------------------------------------------|--------------------------------------------------|------|-------------------------------------------------------------------------------------------------------------------------------|-------|
| Cancer Australia                                           | Support for Cancer Clinical Trials Program Grant | 2013 | National multi-disciplinary membership, governance structure, data and quality, capacity building, collaboration, translation | 33.3% |
|                                                            |                                                  |      | How the funding will be utilized                                                                                              | 33.3% |
|                                                            |                                                  |      | Budget and value for money                                                                                                    | 33.3% |
| Alzheimer's Australia Dementia Research Foundation         | Dementia Grants Program                          | 2017 | Scientific merit and quality (relevance, clarity and suitability of methods and plan)                                         | 50%   |
|                                                            |                                                  |      | Track record and independence of the applicant                                                                                | 30%   |
|                                                            |                                                  |      | Innovation/originality                                                                                                        | 20%   |
|                                                            |                                                  |      | The Scientific Panel will also consider the feasibility of proposed projects                                                  |       |
| Australian and New Zealand College of Anaesthetists        | Project Grants                                   | 2017 | Scientific merit, design/methods, track record, originality, feasibility and international competitiveness                    | NA    |
| Australian Rotary Health                                   | Mental Health Research Grants                    | 2017 | Scientific excellence of the project                                                                                          | NA    |
|                                                            |                                                  |      | Innovation of the project                                                                                                     | NA    |
|                                                            |                                                  |      | Track record of the applicant                                                                                                 | NA    |
|                                                            |                                                  |      | Feasibility, including relevant partnerships                                                                                  | NA    |
|                                                            |                                                  |      | Practical benefits to the mental health of the community                                                                      | NA    |
| Bupa Foundation (Australia) Limited                        | Bupa Health Foundation                           | 2017 | Direct impact on health outcomes                                                                                              | NA    |
|                                                            |                                                  |      | Timing of delivery of results                                                                                                 | NA    |
|                                                            |                                                  |      | Justification of funding                                                                                                      | NA    |
|                                                            |                                                  |      | Study/program design                                                                                                          | NA    |
|                                                            |                                                  |      | Reputation of organisation                                                                                                    | NA    |
| Cure for MND Foundation                                    | Translational Research Grants                    | 2017 | Research strategy and feasibility                                                                                             | 50%   |
|                                                            |                                                  |      | Impact and transition potential                                                                                               | 25%   |
|                                                            |                                                  |      | Personnel and budget                                                                                                          | 25%   |
| Diabetes Australia Research Trust                          | General Grants                                   | 2017 | Research methods and quality                                                                                                  | 40%   |
|                                                            |                                                  |      | Potential research outcomes                                                                                                   | 60%   |
| Healthway (Western Australian Health Promotion Foundation) | Health Promotion Intervention Research Grants    | 2017 | Ability to directly improve health and community outcomes in priority health areas                                            | NA    |
|                                                            |                                                  |      | Contribution of the research to best practice in health promotion                                                             | NA    |
|                                                            |                                                  |      | The quality of the translation plan                                                                                           | NA    |
|                                                            |                                                  |      | End-user partnerships and collaboration                                                                                       | NA    |
|                                                            |                                                  |      | Soundness of rationale and methodology                                                                                        | NA    |
|                                                            |                                                  |      | Track record and capability of research team                                                                                  | NA    |
| HCF Research Foundation                                    | Health Services Research Grants                  | 2017 | Appropriateness of the budget, and overall value for money                                                                    | NA    |
|                                                            |                                                  |      | Scientific merit (design, methodology, feasibility, budget)                                                                   | 40%   |
|                                                            |                                                  |      | Relevance to HCF objectives (translation, response to knowledge gaps, improve health)                                         | 40%   |
|                                                            |                                                  |      | General (repeat other studies/ongoing studies, burden of disease)                                                             | 20%   |
|                                                            | Grants-in-aid                                    | 2017 | Track record of the applicant                                                                                                 | NA    |

|                                                       |                                     |      |                                                                                                                       |     |
|-------------------------------------------------------|-------------------------------------|------|-----------------------------------------------------------------------------------------------------------------------|-----|
| Motor Neurone Disease Research Institute of Australia |                                     |      | Strength of the research plan                                                                                         | NA  |
|                                                       |                                     |      | Relevance to Motor Neurone Disease                                                                                    | NA  |
| Multiple Sclerosis Research Australia                 | Research Grants                     | 2017 | Relevance to Multiple Sclerosis                                                                                       | NA  |
|                                                       |                                     |      | Significance (value and novelty)                                                                                      | NA  |
|                                                       |                                     |      | Feasibility of methods                                                                                                | NA  |
|                                                       |                                     |      | Track record of applicants                                                                                            | NA  |
| National Breast Cancer Foundation                     | Innovator Grant                     | 2017 | Novelty of the project                                                                                                | 50% |
|                                                       |                                     |      | Track record of applicant                                                                                             | 20% |
|                                                       |                                     |      | Quality and feasibility                                                                                               | 20% |
|                                                       |                                     |      | Relevance to National Breast Cancer Foundation research priorities                                                    | 10% |
| National Breast Cancer Foundation                     | Accelerator Research Grant          | 2016 | Translational potential and impact on breast cancer outcomes                                                          | 50% |
|                                                       |                                     |      | Track record of applicant team                                                                                        | 20% |
|                                                       |                                     |      | Scientific quality and feasibility                                                                                    | 20% |
|                                                       |                                     |      | Relevance to National Breast Cancer Foundation research priorities                                                    | 10% |
| National Heart Foundation                             | Vanguard Grant                      | 2017 | Track record of applicants                                                                                            | NA  |
|                                                       |                                     |      | How well the application addresses the purpose of the award                                                           | NA  |
|                                                       |                                     |      | Quality of the research proposal                                                                                      | NA  |
|                                                       |                                     |      | Feasibility of the research proposal                                                                                  | NA  |
|                                                       |                                     |      | Potential to produce tangible outcomes                                                                                | NA  |
| Prostate Cancer Foundation of Australia               | New Concept Grant                   | 2017 | Track record of investigator team                                                                                     | NA  |
|                                                       |                                     |      | Scientific and technical merit of the research question, feasibility, design and methodology.                         | NA  |
|                                                       |                                     |      | Innovation                                                                                                            | NA  |
|                                                       |                                     |      | Potential impact on prostate cancer                                                                                   | NA  |
|                                                       |                                     |      | Research environment (suitability, expertise and collaboration)                                                       | NA  |
| The Movember Group and Beyondblue                     | Australian Mental Health Initiative | 2013 | Alignment and fit with Movember's strategic goals                                                                     | NA  |
|                                                       |                                     |      | Significance/innovation of the project (advance management, address significant areas)                                | NA  |
|                                                       |                                     |      | Project proposal (clarity, achievability, collaboration, consultation with stakeholders, plan, knowledge translation) | NA  |
|                                                       |                                     |      | The project team (proven expertise, capability, record)                                                               | NA  |

NHMRC: National Health and Medical Research Council, NSFC: National Natural Science Foundation of China, MND: Motor Neurone Disease, HCF: The Hospitals Contribution Fund of Australia.

<sup>a</sup> Global Alliance for Chronic Disease Grants include: Request for Applications on Type 2 Diabetes in Low and Middle Income Countries, Request for Applications on the Prevention and Management of Chronic Lung Disease in Middle and Low Income Countries and Indigenous Communities in Australia and Canada, Request for Prevention and Management of Mental Disorders in Low and Middle Income Countries and Indigenous Communities in High Income Countries.

<sup>b</sup>Targeted calls include: Targeted Call for Research into Wind Farms and Human Health, Targeted Call for Research into Preparing Australia for the Genomics Revolution in Health Care, Targeted Call for Research into Engaging and Retaining Young Adults in Interventions to Improve Eating Behaviours and Health Outcomes, Targeted Call for Research into Fetal Alcohol Spectrum Disorder among Aboriginal and Torres Strait Islander Peoples, Targeted Call for Research into Mental Health : Suicide Prevention in Aboriginal and Torres Strait Islander Peoples
